# Supplementary material for: A Phase Separation Inlet for Droplets, Ice Residuals, and InterstitialAerosol Particles
Source: Copernicus journal article supplement (doi:10.5194/amt-2021-26), 2021-03-18
Supplement: Supplementary file [file amt-2021-26-AC1-supplement.pdf]

We would like to start this response to Reviewer document with a thank you to all three Reviewers for their work to help us improve the manuscript. We also thank your patience; the length of time between review and revision was that we took your comments very seriously. First, we have conducted a new and comprehensive set of experiments to validate all inlet components as well as the composite system. This was the source of many review points from all three Reviewers. Second, we have removed the Storm Peak experiments, the source of several comments. We believe this streamlines and focuses the paper on the inlet calibration work. Specific changes are outlined below in a point by point format, including reference improvement, with our response in *italics*. With regard to the extensive new experiments we will often refer to 'please see new content for details' for simplicity.

## Responses to Reviewer 1

Transmission efficiencies: As you claim that the SPIDER inlet is able to sample simultaneously interstitial aerosol particle, droplet residuals, and ice crystal residuals, it would be needed to address the transmission efficiencies for the different channels. To my understanding this can be retrieved from the existing measurements. No particles smaller than the lower size limits of the OPC/OPS ( $\sim 0.3 \mu\text{m}$ ) were measured. Hiranuma et al. (2016) used a condensation particle counter to address the question of transmission of small particles in the different channels. In my opinion, such measurements can help to verify that e.g. no small aerosol particles or small evaporated cloud droplets are able to be transmitted in the droplet or ice channel, respectively. Further, such measurements can also be used for transmission efficiency measurements at the interstitial aerosol channel. This is rather a recommendation for future work and does not imply that new measurements need to be presented in this manuscript.

*We agree with the reviewer that the paper needed an increased level of detail on transmission efficiency and this is now incorporated into the manuscript. We clarify (as added in the paper per this and following comments by all Reviewers) that any CVI is subject to inadvertent transmission. Thus, a CPC will not show a 0 counts but instead reflect the rate of inadvertent transmission. As the Reviewer points out, the OPC measurements detailed here are meant to determine this rate for the size range of interest.*

Ice crystal residuals and cloud droplet residuals are not necessarily only INPs and CCNs, respectively, as cloud droplets can also contain scavenged particles and ice residuals can also contain droplet residuals due impact from secondary ice crystal formation (e.g. see discussion in Kamphus et al., 2010). Based on your statement in the introduction (lines 67 – 70) and in the conclusions (lines 290 – 291), you should be more specific about what ice residuals and cloud droplet residuals are when you sample them with SPIDER. Are you truly only measuring INPs and CCNs?

*The reviewer raises an important point. While we can not determine, a priori, these processes, we now note in the text that there “is not necessarily a 1 to 1 relationship between droplets and ice crystals and residuals. Droplets or ice crystals can scavenge gas- and particle-phase constituents. Droplets and ice crystals can also undergo breakup (more detail in the following sections) or secondary formation processes. The purpose of this work is to detail a means for separation of interstitial aerosol, droplets and ice crystals into three separate channels. The specific cloud properties, such as cloud lifetime, scavenging rates, breakup processes and secondary hydrometeor production mechanisms, at a sampling site will dictate the efficacy of SPIDER to resolve residuals. “*

Specific comments:

Abstract: I suggest to give the size range of ice particles which can be analyzed with SPIDER.

*The size range of ice particles that can be analyzed with SPIDER (2.7 - 25  $\mu\text{m}$ ) has been included in the abstract.*

Lines 26 – 28: I assume that the most important criteria about the Storm Peak Laboratory campaign was that you were able to sample ambient supercooled clouds, which I would mention here.

*Now removed from text*

Lines 29 – 30: „Possible design improvements of SPIDER are also suggested“, are you referring here to using more robust OPCs or OPCs with a higher resolution? It is not clear to me what those design improvements would be.

*See new information with APS and OPS for calibration*

Lines 33 – 34: „Mixed-phase clouds are important factors in aviation and climate (Shupe et al., 2008)“, please add more and also more recent literature, as e.g. Lohmann et al. (2017), McCoy et al. (2016).

*We have added references to McCoy et al. (2016) and Lohmann (2017).*

Lines 38 – 40: „Mixed-phase clouds are particularly complicated because the partitioning of phases is critical in assessing these effects (Atkinson et al., 2013; Hirst et al., 2001; Korolev et al., 2003; Shupe et al., 2006).“ Atkinson et al. (2013) was not investigating this specific research question; also, there is more and also more recent literature about this, e.g. Korolev et al. (2017), Tan and Storelvmo et al. (2019), just to name a few.

*We have replaced Atkinson et al. (2013) with the suggested literature.*

Lines 41 – 43: „This has resulted in a global effort to study these clouds (Abel et al., 2014; Davis et al., 2007a; Hiranuma et al., 2016; Kupiszewski et al., 2015; Mertes et al., 2007; Patade et al., 2016).“ Also here, include more recent studies, e.g. Lohmann et al. (2017), Lowenthal et al. (2019), Schmidt et al. (2017), Ramelli et al. (2021), Ruiz-Donoso et al. (2020).

*The suggested literature has been added.*

Lines 45 – 46: „At this saturation aqueous droplets are the favored state and particles that activate are termed cloud condensation nuclei (CCN) (Lohmann and Hoose, 2009; Wang et al., 2012).“ Those references are not specifically investigating warm cloud activation. I recommend to change the references to e.g. Pruppacher and Klett (1997).

*We have replaced the previous literature referenced with Pruppacher and Klett (1997) as suggested.*

Lines 42 – 49: „Ice can form homogeneously, via spontaneous nucleation of ice in a solution droplet, at temperatures below -40°C (Atkinson et al., 2013; Kamphus et al., 2010; Korolev et al., 2003; Storelvmo et al., 2008; Verheggen et al., 2007; Wang et al., 2012).“ None of those publications focus on homogeneous freezing of solution droplets, I recommend to reference Heymsfield et al. (2017) or Koop et al. (2000).

*We have replaced the previous literature referenced with the suggested references*

Lines 49 – 51: „At higher temperatures, ice forms heterogeneously through different pathways promoted by ice nucleating particles (INPs) (Atkinson et al., 2013; Kamphus et al., 2010; Lohmann and Hoose, 2009; Storelvmo et al., 2008; Tsushima et al., 2006; Verheggen et al., 2007; Wang et al., 2012).“ I recommend to reference rather review papers specifically on INPs, e.g. Hoose and Möhler (2012), Kanji et al. (2017).

*We have replaced the previous literature referenced with the suggested references.*

Lines 51 – 52: „The specific properties that determine an effective INP remain poorly understood (Shupe et al., 2008).“ Shupe et al. (2008) did not investigate INP properties. I suggest to reference Kanji et al. (2017).

*We have replaced the previous literature referenced with the suggested references.*

Lines 62 – 63: „Motivated by climate change, estimated to be warming approximately twice as fast as the global average (Verlinde et al., 2007)...“ please reference more recent literature here.

*Revised this section and replaced with more recent Arctic INP literature. Additionally, more recent literature has been added for INP research at Jungfraujoch.*

Line 94: Please introduce the abbreviation for IS-PCVI.

*Updated to include the full name of the IS-PCVI.*

Lines 102 – 103: I suggest to include the expected D50 for those flow settings.

*We have now included the expected D50 range from the Hiranuma et al., 2016 paper, as well as a reference to the section where we determine the D50 experimentally in this work. Please see also new work to better define the D50.*

Line 103: I suggest to move „the PCVI PF, AF, and SF at 8.0, 2.5, and 1.0 L min<sup>-1</sup>, respectively.“ to below when you introduce the PCVI, e.g. to lines 111 – 112.

*We have moved the PCVI flow conditions as suggested.*

Lines 103 – 105: I suggest to give the Weber Number here (0.3) in comparison to a value of 10 and larger when droplet breakup is expected.

*The Weber number and threshold are included for the L-PCVI and PCVI.*

Section L-PCVI: Based on the experiments presented in Fig. 3 and 4 you could determine the transmission efficiency of interstitial particles in the PF, taking into account the dilution ratio.

*While we agree this type of experiment was possible it was beyond the scope of the experiments we conducted. Previous studies suggest this as ~0.8 which we default to without experimental evidence to the contrary.*

Section Droplet Evaporation Chamber: What is the residence time of cloud droplets and ice crystals in the droplet evaporation section, and does this impact the partial evaporation?

*The residence time (~25 s) and additional data on evaporation has been added.*

Section Sustaining Ice Crystals: It is not clear to me which „chamber“ is meant here. Was the droplet evaporation chamber used to induce homogeneous freezing and form ice crystals? If so, how could you determine if ice crystals survived in the droplet evaporation chamber? As this section belongs to 4.2, I understand that the intention is to test if ice crystals are sustaining in the droplet evaporation chamber, which, in theory, is not needed, as the droplet evaporation chamber is maintained at ice-coated walls (saturated with respect to ice). Maybe you should consider to move this section to 4.3.

*For clarity, this is now stated as the ‘evaporation chamber’. We have rewritten this section and now include quantitative evaporation and ice crystal using a new methodology with ice formed above the chamber. We do believe the evaporation of droplets and maintenance of ice, the two requirements of the evaporation chamber, are now more clearly explained and separated in the text.*

Lines 198 - 199: What is the size of the formed ice crystals? And how were they validated visually?

*See above, now with direct detection using OPS and APS.*

Line 206: Which particle sizes are generated with this AS solution?

*We have added a figure to the Supplement showing the size distribution of AS particles generated by the bubbler.*

Lines 234 – 235: I recommend to not include the discussion about the different OPCs used at the interstitial aerosol channel and cloud residual channel, as you don't show those results.

*This section is now removed and replaced with the new instrument calibration tests.*

Line 241: I suggest to give a number for „low aerosol particle conditions“.

*We have now included a range of particle number concentration for background.*

Lines 249 – 250: This is a repetition from your statement in line 246, I would delete one of the sentences.

*We have removed the initial statement*

Lines 253 – 254: Where is this „inadvertent transmission“ coming from?  
Updated to describe the source of inadvertent transmission. Lines 290 – 291: „Ultimately, information on cloud nucleation capabilities of various aerosol particles could be compared to laboratory work and integrated into climate models (Shupe et al. 2008)“ I recommend to cite also more recent literature here.

*We have added two recent citations.*

The author contributions is missing

*Added the author contribution statement, as well as the competing interests statement.*

Figure 4: There is no panel (c)

*Figure 4C was removed in a previous iteration. All references to old Figure 4C have now been removed.*

Figure 7: Please indicate that this is the transmission efficiency from the PCVI

*Updated to indicate which is L-PCVI and PCVI.*

Figure 8 (and related discussion in the text): Another important parameter for the description of these timeseries would be the ambient temperature, which one could relate to the nucleation temperature of ice crystals in the cloud. More, on 2019-01-21 at ~ 18:30, ice crystal concentrations are as high as 0.03 cm<sup>-3</sup>, which is a relative high INP concentration at temperatures < -20°C (the lower limit of ambient temperature, as

I understand from line 240). Thus, is this an indication for an impact of sampling ice crystals formed by secondary processes?

*Note that in response to comments by all three reviewers we decided to withhold review until after more comprehensive experiments were conducted and also eliminated the Storm Peak data for clarity.*

Figure 9 (panels c, d): Also here, are your measurements impacted by secondary ice crystal production in the smaller size bins? It is quite surprising that the concentration of ice crystal residuals increase towards smaller sizes.

*Now eliminated from the paper.*

Editorial comments:

Line 92: Please introduce the abbreviation „SPIDER“, since it is the first time using it in the main text.

*The full name of SPIDER is now included.*

Line 93: Please introduce the abbreviation „L-PCVI“.

*The full name of the L-PCVI is now included at the first reference.*

Line 222: The abbreviation for INP was introduced earlier.

*The full name of CCN and INP are removed.*

Lines 304 – 305: Remove those test citations.

*The test citations have been removed.*

I suggest to either use supersaturation or relative humidity with respect to water (especially in the droplet evaporation chamber section).

*Updated to (super)saturation.*

As the abbreviation for ammonium sulfate (AS) is only used a few times in the manuscript I suggest to use the full name.

*We have updated to change “AS” to “ammonium sulfate” globally.*

The resolution of Figures 3, 4, 8, and 9 can be improved.

*Figure resolution has been updated globally.*

## References

- Heymsfield, A. J., Krämer, M., Luebke, A., Brown, P., Cziczo, D. J., Franklin, C., Lawson, P., Lohmann, U., McFarquhar, G., Ulanowski, Z., and Van Tricht, K.: Cirrus Clouds, *Meteorological Monographs*, 58, 2.1-2.26, 10.1175/amsmonographs-d-16-0010.1, 2017.
- Hoose, C., and Möhler, O.: Heterogeneous ice nucleation on atmospheric aerosols: a review of results from laboratory experiments, *Atmos. Chem. Phys.*, 12, 9817 - 9854, 10.5194/acp-12-9817-2012, 2012.
- Kanji, Z. A., Ladino, L. A., Wex, H., Boose, Y., Burkert-Kohn, M., Cziczo, D. J., and Krämer, M.: Overview of Ice Nucleating Particles, *Meteorological Monographs*, 58, 1.1-1.33, 10.1175/amsmonographs-d-16-0006.1, 2017.
- Koop, T., Luo, B., Tsias, A., and Peter, T.: Water activity as the determinant for homogeneous ice nucleation in aqueous solutions, *Nature*, 406, 611-614, 10.1038/35020537, 2000a.
- Korolev, A., McFarquhar, G., Field, P. R., Franklin, C., Lawson, P., Wang, Z., Williams, E., Abel, S. J., Axisa, D., Borrmann, S., Crosier, J., Fugal, J., Krämer, M., Lohmann, U., Schlenczek, O., Schnaiter, M., and Wendisch, M.: Mixed-Phase Clouds: Progress and Challenges, *Meteorol. Monogr.*, 58, 5.1-5.50, 10.1175/amsmonographs-d-17-0001.1, 2017.
- Lohmann, U.: Anthropogenic Aerosol Influences on Mixed-Phase Clouds, *Current Climate Change Reports*, 3, 32-44, 10.1007/s40641-017-0059-9, 2017.
- Lowenthal, D. H., Hallar, A. G., David, R. O., McCubbin, I. B., Borys, R. D., and Mace, G. G.: Mixed-phase orographic cloud microphysics during StormVEx and IFRACS, *Atmos. Chem. Phys.*, 19, 5387-5401, 10.5194/acp-19-5387-2019, 2019.
- McCoy, D. T., Tan, I., Hartmann, D. L., Zelinka, M. D., and Storelvmo, T.: On the relationships among cloud cover, mixed-phase partitioning, and planetary albedo in GCMs, *Journal of Advances in Modeling Earth Systems*, 8, 650-668, <https://doi.org/10.1002/2015MS000589>, 2016.
- Pruppacher, H. R., and Klett, J. D.: *Microphysics of Clouds and Precipitation*, Kluwer Acad. Norwell, Mass, 1997.
- Ramelli, F., Henneberger, J., David, R. O., Lauber, A., Pasquier, J. T., Wieder, J., Bühl, J., Seifert, P., Engelmann, R., Hervo, M., and Lohmann, U.: Influence of low-level blocking and turbulence on the microphysics of a mixed-phase cloud in an inner-Alpine valley, *Atmos. Chem. Phys.*, 21, 5151-5172, 10.5194/acp-21-5151-2021, 2021.



Ruiz-Donoso, E., Ehrlich, A., Schäfer, M., Jäkel, E., Schemann, V., Crewell, S., Mech, M., Kulla, B. S., Kliesch, L. L., Neuber, R., and Wendisch, M.: Small-scale structure of thermodynamic phase in Arctic mixed-phase clouds observed by airborne remote sensing during a cold air outbreak and a warm air advection event, *Atmos. Chem. Phys.*, 20, 5487-5511, 10.5194/acp-20-5487-2020, 2020.

Schmidt, S., Schneider, J., Klimach, T., Mertes, S., Schenk, L. P., Kupiszewski, P., Curtius, J., and Borrmann, S.: Online single particle analysis of ice particle residuals from mountain-top mixed-phase clouds using laboratory derived particle type assignment, *Atmos. Chem. Phys.*, 17, 575-594, 10.5194/acp-17-575-2017, 2017.

Tan, I., and Storelvmo, T.: Evidence of Strong Contributions From Mixed-Phase Clouds to Arctic Climate Change, *Geophysical Research Letters*, 46, 2894-2902, <https://doi.org/10.1029/2018GL081871>, 2019.
